# Supplementary material for: Widen the Applicability of a Convolutional Neural-Network-Assisted Glaucoma Detection Algorithm of Limited Training Images across Different Datasets
Source: MDPI journal article supplement (doi:10.3390/biomedicines10061314), 2022-06-03
Supplement: s1 [file s1]

Supplementary Materials for Widen the Applicability of a Convolutional Neural-Network-Assisted Glaucoma Detection Algorithm of Limited Training Images across Different Datasets

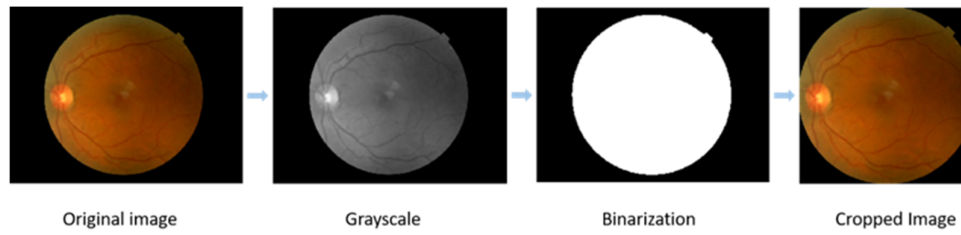

**Figure S1.** The preprocessing process to crop the region of interest as a square. The fundus images were first converted into grayscale, followed by binarization to crop the image along the boundaries automatically. For images not being square after cropping, the shortage will be filled with zero padding. The cropped images were then re-converted to color images without enhancement of contrast.

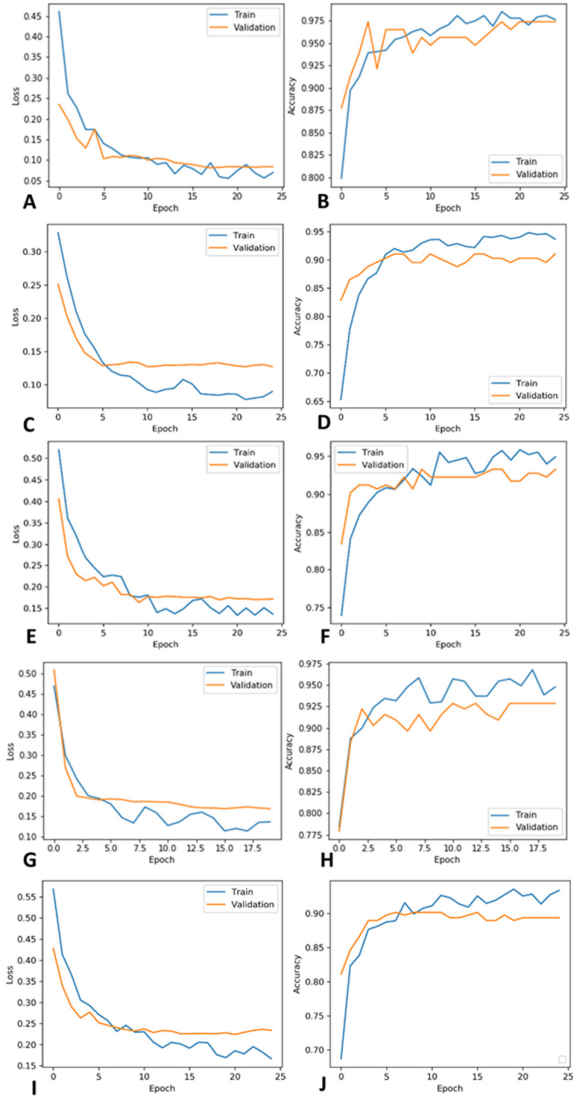

**Figure S2.** Training curves of the deep learning models. The blue and orange lines in the left panel (A,C,E,G,I) show that the loss of training and validation datasets decreased over time, respectively; while the accuracy increased over time in the left panel (B,D,F,H,J). With the increase of accuracy, the loss curve of the validation dataset remained stable and approximated that of the training curve indicating that the deep learning models were stable and not overfitted. The loss curves of TVGH (A), DRITSHI-GS1-specific (C), RIN-ONE r2-specific (E), CHGH-specific (G), and integrated (I) models. The accuracy curves of TVGH (B), DRITSHI-GS1-specific (D), RIN-ONE r2-specific (F), CHGH-specific (H), and integrated (J) models.

**Table S1.** Performance of deep learning models in detecting glaucoma using large training datasets or specific approaches to improve accuracy.

| First author,<br>publication year | Classifier platform<br>(Modification)         | Image numbers                                 | Validation/testing dataset<br>(Type)            | Sensitivity (%) | Specificity (%) | AUC           |
|-----------------------------------|-----------------------------------------------|-----------------------------------------------|-------------------------------------------------|-----------------|-----------------|---------------|
| This study                        | EfficientNet B3<br>(Nil)                      | 944                                           | Local independent                               | 93.75           | 97.50           | 0.991         |
|                                   | EfficientNet B3<br>(Integrated)               | 1658                                          | External clinic                                 | 92.50           | 91.25           | 0.930         |
|                                   |                                               |                                               | Public/ different ethnicity                     | 77.5-80.0       | 20.0-87.5       | 0.840-0.930   |
|                                   | EfficientNet B3<br>(Dataset-specific)         | 944+(158/101/455)                             | External clinic                                 | 90.0            | 95.0            | 0.963         |
|                                   |                                               |                                               | Public/ different ethnicity                     | 82.5-100        | 90.0-92.5       | 0.922-0.990   |
| Li, 2018 [13]                     | Deep learning (Nil)                           | 39745                                         | Local independent                               | 95.6            | 92.0            | 0.986         |
| Liu, 2019 [14]                    | ResNet (Nil)                                  | 274413                                        | Local independent                               | 96.2            | 97.7            | 0.996         |
|                                   |                                               |                                               | External clinic                                 | 93.6-99.1       | 95.6-97.1       | 0.987-0.995   |
|                                   |                                               |                                               | Population screening                            | 91.0            | 92.6            | 0.964         |
|                                   |                                               |                                               | Multiethnic                                     | 87.7            | 80.8            | 0.923         |
|                                   |                                               |                                               | Images of variable quality                      | 82.2            | 70.4            | 0.823         |
| Wu, 2022 [30]                     | Meta-analysis of neural<br>network algorithms | 180534                                        | Not specified                                   | 0.91            | 0.91            | 0.96          |
| Diaz-Pinto, 2019<br>[35]          | Xception(Integrated)                          | 1707 (5 public datasets)                      | Local independent                               | 0.9346          | 0.8580          | 0.9605        |
|                                   |                                               | 45/101/455/401/705(4 the 5 public<br>dataset) | External (the one not<br>included for training) | 68.93-83.33     | 70.20-79.90     | 0.7678-0.8575 |
| Gheisari, 2021 [36]               | VGG-16+LSTM<br>(Temporal features)            | 1810(+295 fundus videos)                      | Local independent                               | 95              | 96              | 0.9619        |
| Xu, 2021 [37]                     | Transfer induced<br>attention network         | 1882(glaucoma)+10463(cataract)                | Local independent                               | 84.9            | 86.9            | 0.929         |
|                                   |                                               |                                               | Public/different ethnicity                      | 75.36           | 77.2            | 0.835         |

AUC: the area under the receiver operating characteristic curve.
